# Supplementary material
Source: PubMed Central journal article supplement (PMC3442577)
Supplement: supp_tpc.112.097733_tpc097733Supplemental.pdf [file supp_tpc.112.097733_tpc097733Supplemental.pdf]

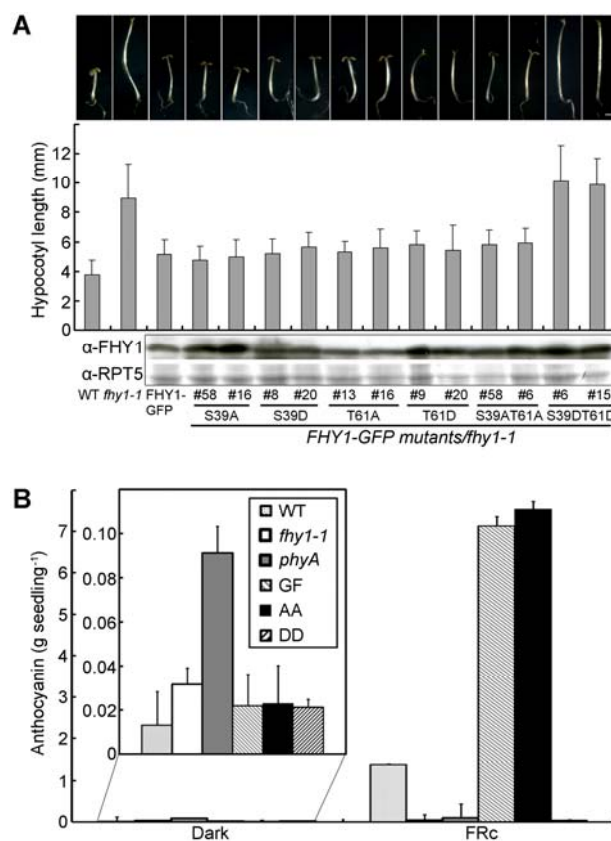

**Supplemental Figure 1. Phosphorylation on S39 and T61 Inactivates FHY1.**

**(A)** Morphology of 5-day-old FR grown *fhy1-1* seedlings expressing mutant FHY1-GFP. All FHY1 mutations are as same as described in Figure 1D except that GFP is fused with C terminal of FHY1. Top, typical images of wild-type, *fhy1-1*, *FHY1-GFP/fhy1* and two independent lines for each mutation (Bar=1mm); Middle, measurements of hypocotyl lengths corresponding to the top panel, all measurements were biologically repeated at least three times, error bars represent  $\pm$  SD (n=20); Bottom, immunoblots showing accumulation of mutant FHY1-GFP in corresponding transgenic seedlings, RPT5 was used as loading control.

**(B)** FHY1 phosphorylation impairs anthocyanin accumulation. Seedlings indicated were grown in dark or FR for 5 days. GF, *GFP-FHY1/fhy1-1*; AA, *GFP-FHY1<sup>S39AT61A</sup>/fhy1-1*; DD, *GFP-FHY1<sup>S39DT61D</sup>/fhy1-1*. Mean  $\pm$  SD (n=3).

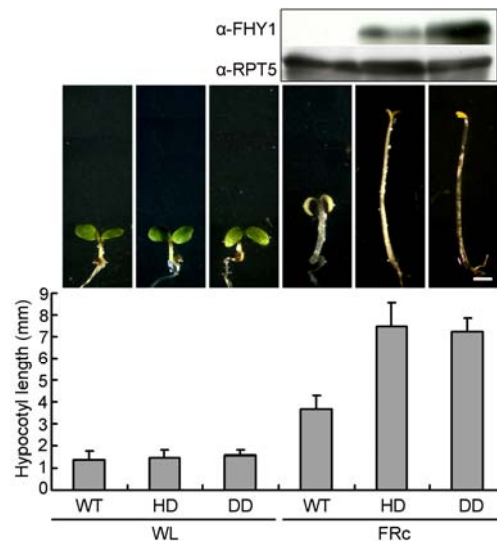

**Supplemental Figure 2. Transgenic GFP-FHY1<sup>S39DT61D</sup> Exhibits Dominant Traits over Wild-type FHY1 in F1 Heterozygous Seedlings.**

Seedlings were grown in white light (WL) or continuous far-red light (FRc) for five days. WT, wild-type seedlings (Ler); DD, homozygous transgene GFP-FHY1<sup>S39DT61D</sup> in *hy1-1* mutant background; HD, heterozygous F1 seedlings of WT $\times$ DD. Upper, western blot shows the protein level of GFP-FHY1<sup>S39DT61D</sup> in WT, HD and DD seedlings. Middle, phenotype of corresponding seedlings grown in WL or FRc. Bottom, Statistic analysis of hypocotyl lengths. mean $\pm$ SD (n>50).

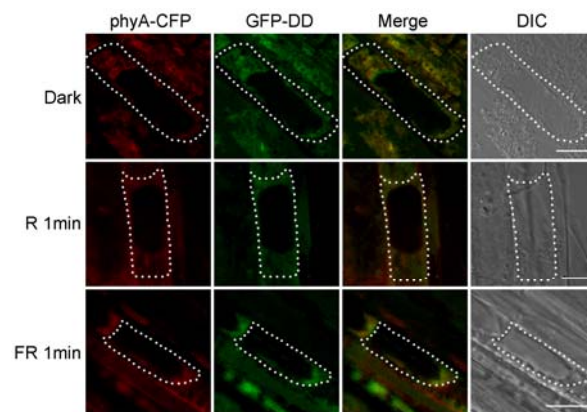

**Supplemental Figure 3. P-mimic FHY1 and phyA Co-localize in the Cytosol.**

*GFP-FHY<sup>S39DT61D</sup>/fhy1-1* (GFP-DD) was crossed into *phyA-CFP/phyA-201*. Four day etiolated F1 seedlings were irradiated with R or FR for 1 min before microscope imaging. A hypocotyl cell is outlined by dotted line. Bar=20 $\mu$ m.

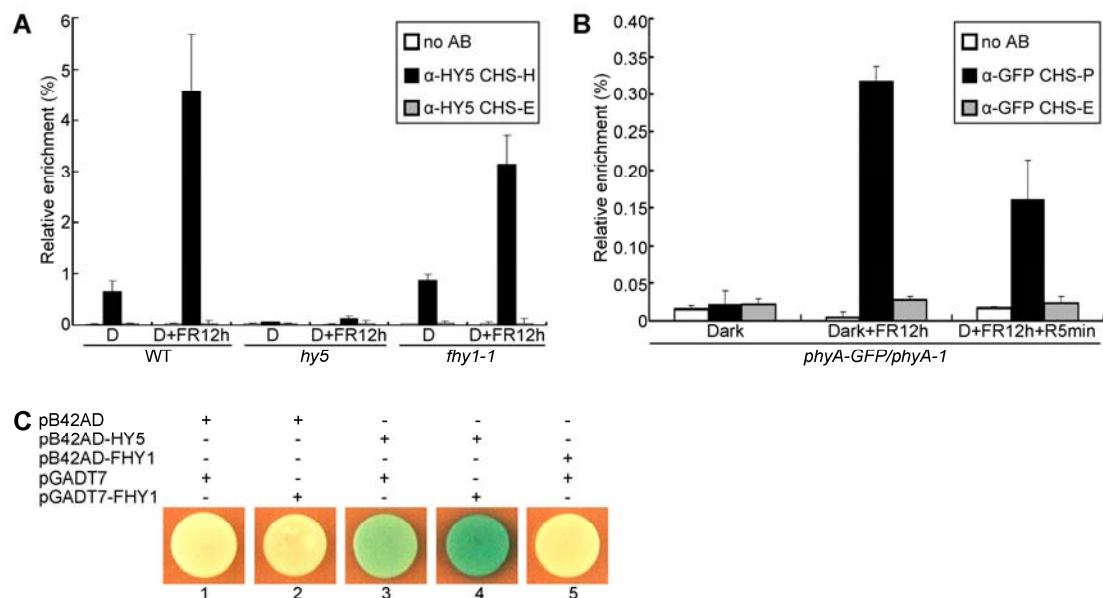

**Supplemental Figure 4. FHY1 and phyA Associate with the CHS Promoter.**

**(A)** HY5 associates with *CHS* promoter independently of FHY1. Four day etiolated wild-type, *hy5* and *fhy1-1* seedlings were irradiated with (D+FR12h) or without (D) FR for 12h and examined by anti-HY5 ChIP-qPCR. AB, antibody; CHS-H, HY5 binding region on *CHS* promoter; CHS-E, *CHS* exon region.

**(B)** Both Pr and Pfr form of *phyA* associate with *CHS* promoter. Four day etiolated *phyA-GFP/phyA-1* seedlings were irradiated with 12h FR (Pr *phyA*) or with 12h FR followed by 5min R (Pfr *phyA*) before they were analyzed by anti-GFP ChIP-qPCR. CHS-P, PIF3 binding region on *CHS* promoter.

**(C)** FHY1 enhances HY5 transcriptional activity in yeast. Lane 1, two AD vectors are co-expressed in yeast harboring *CHSp::LacZ* report construct; lane 2 and 5, FHY1 alone can not induce  $\beta$ -galactosidase activity in yeast; lane 3, HY5 alone induces  $\beta$ -galactosidase activity at a lower level; lane 4, co-expression of HY5 and FHY1 induces  $\beta$ -galactosidase activity at a higher level.

All error bars represent  $\pm$ SD of triplicate experiments.

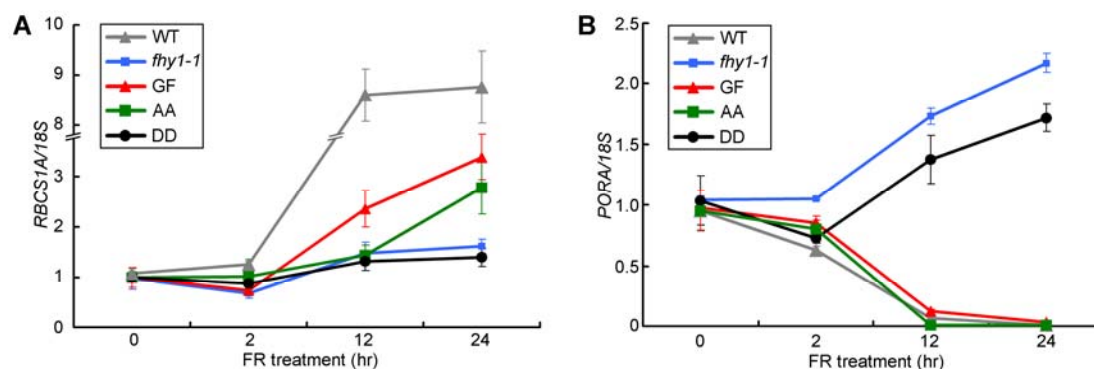

**Supplemental Figure 5. Phosphorylation of FHY1 Affects the Expression of *RBCS1A* and *PORA*.**

**(A)** Expression of light-induced gene *RBCS1A* is suppressed in P-mimic FHY1 background. Four day etiolated wild-type, *fhy1-1*, *GFPFHY1/fhy1* (GF), *GFP<sup>S39AT61A</sup>/fhy1* (AA) and *GFP<sup>S39DT61D</sup>/fhy1* (DD) seedlings were irradiated with FR for 0, 2, 12 or 24 hours. All data were normalized by *18S* in the RT-qPCR.

**(B)** Expression of light-repressed gene *PORA* is induced in P-mimic FHY1 background. Same batch of samples in **(A)** was used to examine *RBCS1A* expression. All error bars represent  $\pm$ SD of triplicate experiments.

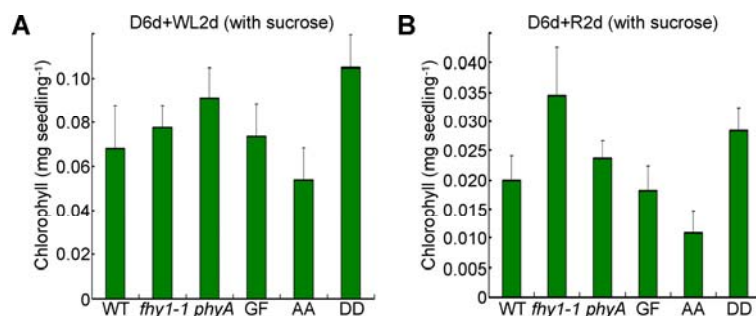

**Supplemental Figure 6. FHY1 Phosphorylation Benefits the Greening Process of Etiolated Seedlings.**

**(A)** Chlorophyll concentration in seedlings upon dark to white-light switch. Seedlings of indicated genotype (as described in Figure 6A) were grown on MS medium with 1% sucrose in dark for 6 days and transferred to white-light (WL) for 2 days before chlorophyll measurement.

**(B)** Chlorophyll concentration in seedlings upon dark to R switch. Seedlings as described in **(A)** were grown on MS medium with 1% sucrose in dark for 6 days and transferred to R for 2 days before chlorophyll measurement.

All error bars represent  $\pm$ SD of triplicate experiments.

**Supplemental Table 1. A List of primers used in this study.**

| Plasmid<br>Constructs | Gene                 | Name | Sequence (5'- to -3')                  |                               |
|-----------------------|----------------------|------|----------------------------------------|-------------------------------|
| pUC18-mFHY1           | FHY1 <sup>S39A</sup> | F    | AAGTTGAGGTGGCCAAGAAGAGG                |                               |
|                       |                      | R    | CCTCTTCTTGGCCACCTCAACTT                |                               |
|                       | FHY1 <sup>S39D</sup> | F    | AAGTTGAGGTGGACAAGAAGAGG                |                               |
|                       |                      | R    | CCTCTTCTTGTCCACCTCAACTT                |                               |
|                       | FHY1 <sup>T61A</sup> | F    | TGTCAAAGCACGCTTGTTTTGC                 |                               |
|                       |                      | R    | GCAAAACAAGCGTGCTTTGACA                 |                               |
|                       | FHY1 <sup>T61D</sup> | F    | TGTCAAAGCACGATTGTTTTGC                 |                               |
|                       |                      | R    | GCAAAACAATCGTGCTTTGACA                 |                               |
|                       | FHY1 <sup>Δnls</sup> | F    | AGCGCAGCAGCAGCATTTCAGACAGATCAA<br>TC   |                               |
|                       |                      | R    | AAATGCTGCTGCTGCGCTCACCTCAACTTC<br>TTC  |                               |
|                       | FHY1 <sup>Δnes</sup> | F    | TCGGCAGCAGCTGCGTCAAAGCACACTTG<br>TTTTG |                               |
|                       |                      | R    | TGACGCAGCTGCTGCCGATAACTCATCAGA<br>TTG  |                               |
|                       | pSY738-FHY1          | FHY1 | F                                      | AAGTCGACAATGCCTGAAGTGGAAAG    |
|                       |                      |      | R                                      | TACGCGGCCGCTACAGCATTAGCGTTGAG |
| pSY735-FHY1           | F                    |      | AAGTCGACAATGCCTGAAGTGGAAAG             |                               |
|                       | R                    |      | TACGGATCCCTTACAGCATTAGCGTTGAG          |                               |
| pGADT7-FHY1           | F                    |      | AGCGGTACCATGCCTGAAGTGGAAAG             |                               |
|                       | R                    |      | GACTCGAGATTACAGCATTAGCGTT              |                               |
| pB42AD-FHY1           | F                    |      | CGGAATTCGGATGCCTGAAGTGGAA              |                               |
|                       | R                    |      | GACTCGAGTTACAGCATTAGCGTT               |                               |
| pSY736-HY5            | HY5                  |      | F                                      | TCAGTCGACAATGCAGGAACAAGCG     |
|                       |                      |      | R                                      | TGCGGATCCTTCAAAGGCTTGCATC     |
| pB42AD-HY5            |                      |      | F                                      | CGGAATTCATGCAGGAACAAGCG       |
|                       |                      |      | R                                      | GACTCGAGTCAAAGGCTTGCATC       |
| pSY728-PIF3           | PIF3                 |      | F                                      | TCAGTCGACGATGCCTCTGTTTTGAG    |

|                           |                    |   |                            |
|---------------------------|--------------------|---|----------------------------|
|                           |                    | R | TACGCGGCCGCCACGACGATCCACA  |
| pGreenII0800<br>-LUC-CHSp | CHSp<br>(-1000~-1) | F | TGGCGGTTTTGGTACCCCGGGTCAAC |
|                           |                    | R | CCATCACCATGGTAGTATACACCAAC |
| pLacZ2 $\mu$ -CHSp        | CHSp<br>(-250~-50) | F | AGTGGTACCCACCATTCAATCTTG   |
|                           |                    | R | TCACTCGAGACTAAACAAGTTAGG   |
